# Supplementary material for: Natural Isotope Abundances of Carbon and Nitrogen in Tissue Proteins and Amino Acids as Biomarkers of the Decreased Carbohydrate Oxidation and Increased Amino Acid Oxidation Induced by Caloric Restriction under a Maintained Protein Intake in Obese Rats
Source: PubMed Central journal article supplement (PMC6567081; doi:10.3390/nu11051087), 2019-05-16
Supplement: nutrients-11-01087-s001.pdf [file nutrients-11-01087-s001.pdf]

## Supplementary materials

**Supplementary Table S1:** Natural abundances of nitrogen and carbon stable isotopes ( $\delta^{15}\text{N}$  and  $\delta^{13}\text{C}$ , ‰) in dietary macronutrients and in dietary protein-bound amino acids (means of triplicate determination).

|               | $\delta^{15}\text{N}$ (‰) | $\delta^{13}\text{C}$ (‰) |
|---------------|---------------------------|---------------------------|
| Lipids        |                           | -29.12                    |
| Carbohydrates |                           | -15.59                    |
| Protein       | 5.78                      | -22.10                    |
| Ala           | 6.18                      | -22.09                    |
| Asx           | 7.31                      | -21.61                    |
| Glx           | 8.41                      | -18.61                    |
| Gly           | 6.46                      | -24.47                    |
| Pro           | 6.59                      | -20.51                    |
| Ile           | 6.16                      | -26.14                    |
| Leu           | 5.02                      | -32.48                    |
| Val           | 8.63                      | -29.72                    |
| Met           | 6.10                      | -24.31                    |
| Phe           | 8.22                      | -27.85                    |
| Lys           | 6.63                      | -16.88                    |

**Supplementary Table S2: qPCR primers used for cDNA amplifications**

| Gene          | Primers | Sequence                          |
|---------------|---------|-----------------------------------|
| <i>Aass</i>   | Forward | GGA-GCC-CCA-TGA-ATT-AAA-AGA-A     |
|               | Reverse | ACT-TAA-CAC-CGT-CCC-ATA-CAC-TTT-C |
| <i>Arg1</i>   | Forward | GGT-CCC-GCA-GCA-TTA-AGG-A         |
|               | Reverse | GGT-CCC-GCA-GCA-TTA-AGG-A         |
| <i>Asns</i>   | Forward | CCA-TCA-CTG-TAC-GGA-TGA-ACC-A     |
|               | Reverse | CGG-TCA-GTC-ATC-AAG-CGT-TTC       |
| <i>Bckdha</i> | Forward | GTG-GGA-TGA-GGA-ACA-GGA-GAA-G     |
|               | Reverse | GGC-TTG-GGT-TGG-GCT-TTA-G         |
| <i>Gls2</i>   | Forward | CGA-CTT-GGT-GAC-CTG-CTT-TTC-T     |
|               | Reverse | TTC-AGG-GCC-GTG-GTG-AAC           |
| <i>Gpt1</i>   | Forward | AGG-GTG-GAG-TAT-GCA-GTT-CGA       |
|               | Reverse | TGG-CAC-GGA-TGA-CCT-CAG-T         |
| <i>Hal</i>    | Forward | AAG-ATG-TGG-TCC-CCG-AAG-AGT       |
|               | Reverse | GTG-CCA-GGC-CTT-CTT-TTG-G         |
| <i>Oat</i>    | Forward | TGG-TGG-CTT-ATA-TCC-CGT-GTC-T     |
|               | Reverse | TGC-TCG-CCT-GGT-TTA-ATG-GT        |
| <i>Pycr2</i>  | Forward | TGC-AGC-TCT-CTT-GTT-CGA-ATA-CA    |
|               | Reverse | GCT-TCC-GCT-CTC-TGC-TCA-TC        |
| <i>Sds</i>    | Forward | CAT-CCC-AGC-CAC-TAT-CGT-TGT       |
|               | Reverse | CAG-CAT-CTC-TCC-CAC-CAC-TTC       |
| <i>Tat</i>    | Forward | AAG-GCA-GTG-TGT-CCC-CAT-CT        |
|               | Reverse | TGC-AAT-CTG-AAA-ACA-CCA-TGT-CA    |

**Supplementary Table S3:** Natural abundances of nitrogen stable isotopes in tissue protein-bound amino acids (AA) ( $\Delta^{15}\text{N}_{\text{tissue AA}} = \delta^{15}\text{N}_{\text{tissue AA}} - \delta^{15}\text{N}_{\text{diet AA}}$ , ‰). Data are means  $\pm$  standard error for rats with ad-libitum (AL) access to food (AL group, n=8) or submitted to a gradual caloric restriction (CR group, n=8). Non-transaminating and indispensable (NTI) AA.

| Amino acid | Group | Intestine        | Plasma           | <i>Gastrocnemius</i> muscle | Heart            | Tissue effect | Group effect |
|------------|-------|------------------|------------------|-----------------------------|------------------|---------------|--------------|
| Ala        | AL    | 3.87 $\pm$ 0.19  | 7.59 $\pm$ 0.36  | 6.27 $\pm$ 0.41             | 9.07 $\pm$ 0.42  | <0.001        | NS           |
|            | CR    | 4.75 $\pm$ 0.27  | 7.24 $\pm$ 0.37  | 6.70 $\pm$ 0.34             | 8.96 $\pm$ 0.61  |               |              |
| Asx        | AL    | 5.25 $\pm$ 0.10  | 6.00 $\pm$ 0.35  | 3.69 $\pm$ 0.15             | 6.43 $\pm$ 0.35  | <0.001        | NS           |
|            | CR    | 5.14 $\pm$ 0.42  | 5.48 $\pm$ 0.21  | 3.24 $\pm$ 0.19             | 6.97 $\pm$ 0.30  |               |              |
| Glx        | AL    | 4.52 $\pm$ 0.41  | 5.80 $\pm$ 0.32  | 5.34 $\pm$ 0.69             | 7.25 $\pm$ 0.59  | <0.001        | NS           |
|            | CR    | 5.40 $\pm$ 0.54  | 5.15 $\pm$ 0.69  | 5.55 $\pm$ 0.24             | 8.69 $\pm$ 0.40  |               |              |
| Gly        | AL    | 2.68 $\pm$ 0.36  | 6.28 $\pm$ 0.25  | 4.28 $\pm$ 0.50             | 5.38 $\pm$ 0.41  | <0.001        | NS           |
|            | CR    | 3.11 $\pm$ 0.60  | 5.19 $\pm$ 0.31  | 4.13 $\pm$ 0.58             | 5.37 $\pm$ 0.54  |               |              |
| Pro        | AL    | 6.12 $\pm$ 0.44  | 13.07 $\pm$ 0.24 | 5.28 $\pm$ 0.19             | 8.08 $\pm$ 0.30  | <0.001        | NS           |
|            | CR    | 6.87 $\pm$ 0.26  | 11.57 $\pm$ 0.37 | 5.17 $\pm$ 0.20             | 7.51 $\pm$ 0.31  |               |              |
| Ile        | AL    | 6.08 $\pm$ 0.25  | 4.35 $\pm$ 0.18  | 4.78 $\pm$ 0.65             | 10.17 $\pm$ 0.36 | <0.001        | <0.05        |
|            | CR    | 3.46 $\pm$ 0.55  | 4.15 $\pm$ 0.29  | 4.35 $\pm$ 0.16             | 10.96 $\pm$ 0.35 |               |              |
| Leu        | AL    | 5.36 $\pm$ 0.20  | 4.64 $\pm$ 0.18  | 5.38 $\pm$ 0.27             | 8.61 $\pm$ 0.13  | <0.001        | <0.05        |
|            | CR    | 4.41 $\pm$ 0.28  | 3.92 $\pm$ 0.25  | 5.86 $\pm$ 0.17             | 8.52 $\pm$ 0.37  |               |              |
| Val        | AL    | 5.33 $\pm$ 0.91  | 5.15 $\pm$ 0.17  | 3.60 $\pm$ 0.57             | 6.82 $\pm$ 0.27  | <0.001        | <0.05        |
|            | CR    | 2.83 $\pm$ 0.60  | 3.21 $\pm$ 0.43  | 3.30 $\pm$ 0.22             | 7.50 $\pm$ 0.38  |               |              |
| Lys (NTI)  | AL    | -3.01 $\pm$ 0.24 | -1.75 $\pm$ 0.18 | -1.98 $\pm$ 0.46            | -1.62 $\pm$ 0.26 | <0.001        | <0.001       |
|            | CR    | -0.80 $\pm$ 0.28 | -0.64 $\pm$ 0.41 | -0.29 $\pm$ 0.29            | -2.99 $\pm$ 0.17 |               |              |
| Met (NTI)  | AL    | 2.52 $\pm$ 0.36  | 4.58 $\pm$ 0.29  | 2.80 $\pm$ 0.53             | 4.55 $\pm$ 0.40  | <0.001        | NS           |
|            | CR    | 2.42 $\pm$ 0.49  | 2.61 $\pm$ 0.61  | 3.76 $\pm$ 0.26             | 5.35 $\pm$ 0.52  |               |              |
| Phe (NTI)  | AL    | 0.19 $\pm$ 0.19  | 0.89 $\pm$ 0.19  | 0.84 $\pm$ 0.64             | 0.66 $\pm$ 0.34  | NS            | NS           |
|            | CR    | 2.29 $\pm$ 0.22  | 0.26 $\pm$ 0.31  | 1.38 $\pm$ 0.44             | 1.17 $\pm$ 0.17  |               |              |

**Supplementary Table S4:** Natural abundances of carbon stable isotopes in tissue protein-bound amino acids ( $\Delta^{13}\text{C}_{\text{tissue AA}} = \delta^{13}\text{C}_{\text{tissue AA}} - \delta^{13}\text{C}_{\text{diet AA}}$ , ‰). Data are means  $\pm$  standard error for rats with ad-libitum access to food (AL group, n=8) or submitted to a gradual caloric restriction (CR group, n=8). Indispensable (I) AA.

| Amino acid | Group | Intestine        | Plasma           | <i>Gastrocnemius</i> muscle | Heart            | Tissue effect | Group effect |
|------------|-------|------------------|------------------|-----------------------------|------------------|---------------|--------------|
| Ala        | AL    | 2.91 $\pm$ 0.30  | 2.90 $\pm$ 0.11  | 5.12 $\pm$ 0.34             | 5.67 $\pm$ 0.31  | <0.001        | <0.001       |
|            | CR    | 1.63 $\pm$ 0.26  | 0.72 $\pm$ 0.23  | 2.18 $\pm$ 0.18             | 2.20 $\pm$ 0.27  |               |              |
| Asx        | AL    | 3.56 $\pm$ 0.37  | 6.49 $\pm$ 0.26  | 1.20 $\pm$ 0.39             | 2.93 $\pm$ 0.91  | <0.001        | <0.001       |
|            | CR    | 1.52 $\pm$ 0.49  | 5.61 $\pm$ 0.20  | 0.58 $\pm$ 0.29             | 0.01 $\pm$ 0.97  |               |              |
| Glx        | AL    | -0.05 $\pm$ 0.15 | 0.97 $\pm$ 0.13  | -0.85 $\pm$ 0.15            | -1.65 $\pm$ 0.17 | <0.001        | <0.001       |
|            | CR    | -0.79 $\pm$ 0.21 | 0.22 $\pm$ 0.19  | -1.77 $\pm$ 0.26            | -2.62 $\pm$ 0.11 |               |              |
| Gly        | AL    | 4.07 $\pm$ 0.55  | 10.48 $\pm$ 1.22 | 5.28 $\pm$ 0.55             | 7.20 $\pm$ 1.08  | <0.001        | <0.05        |
|            | CR    | 3.49 $\pm$ 0.41  | 4.55 $\pm$ 1.41  | 4.81 $\pm$ 0.48             | 6.46 $\pm$ 0.88  |               |              |
| Pro        | AL    | 2.43 $\pm$ 0.23  | 4.41 $\pm$ 0.04  | 1.18 $\pm$ 0.15             | 2.57 $\pm$ 0.28  | <0.001        | NS           |
|            | CR    | 1.86 $\pm$ 0.17  | 4.23 $\pm$ 0.24  | 1.28 $\pm$ 0.30             | 2.64 $\pm$ 0.32  |               |              |
| Ile (I)    | AL    | 1.10 $\pm$ 0.12  | 0.85 $\pm$ 0.08  | 1.76 $\pm$ 0.19             | 2.16 $\pm$ 0.09  | <0.001        | <0.05        |
|            | CR    | 1.60 $\pm$ 0.14  | 1.15 $\pm$ 0.19  | 2.31 $\pm$ 0.18             | 2.01 $\pm$ 0.15  |               |              |
| Leu (I)    | AL    | 1.77 $\pm$ 0.30  | 1.21 $\pm$ 0.10  | 1.64 $\pm$ 0.13             | 0.57 $\pm$ 0.19  | <0.001        | NS           |
|            | CR    | 0.92 $\pm$ 0.20  | 1.01 $\pm$ 0.09  | 1.91 $\pm$ 0.09             | 0.87 $\pm$ 0.24  |               |              |
| Val (I)    | AL    | 2.37 $\pm$ 0.18  | 1.82 $\pm$ 0.41  | 2.38 $\pm$ 0.31             | 2.52 $\pm$ 0.30  | NS            | NS           |
|            | CR    | 2.01 $\pm$ 0.40  | 1.97 $\pm$ 0.51  | 2.32 $\pm$ 0.19             | 3.17 $\pm$ 0.23  |               |              |
| Lys (I)    | AL    | -3.34 $\pm$ 0.37 | -2.63 $\pm$ 0.48 | -3.96 $\pm$ 0.55            | -3.40 $\pm$ 0.53 | NS            | <0.05        |
|            | CR    | -2.68 $\pm$ 0.36 | -2.14 $\pm$ 0.31 | -2.68 $\pm$ 0.41            | -2.35 $\pm$ 0.56 |               |              |
| Met (I)    | AL    | -2.45 $\pm$ 0.28 | -3.28 $\pm$ 0.15 | -3.63 $\pm$ 0.12            | -2.85 $\pm$ 0.34 | <0.001        | NS           |
|            | CR    | -2.55 $\pm$ 0.21 | -3.88 $\pm$ 0.11 | -2.50 $\pm$ 0.19            | -2.89 $\pm$ 0.17 |               |              |
| Phe (I)    | AL    | 0.31 $\pm$ 0.16  | 0.29 $\pm$ 0.04  | 0.23 $\pm$ 0.08             | -0.13 $\pm$ 0.12 | <0.001        | NS           |
|            | CR    | 0.22 $\pm$ 0.10  | 0.10 $\pm$ 0.07  | 0.77 $\pm$ 0.17             | -0.08 $\pm$ 0.06 |               |              |
